# Supplementary material for: Precisely printable and biocompatible silk fibroin bioink for digital light processing 3D printing
Source: PubMed Central journal article supplement (PMC5915392; doi:10.1038/s41467-018-03759-y), 2018-04-24
Supplement: 41467_2018_3759_MOESM2_ESM.pdf [file 41467_2018_3759_MOESM2_ESM.pdf]

**Description of Additional Supplementary Files**

**for “Precisely printable and biocompatible silk fibroin bio-ink for digital light processing 3D printing”**

**Kim *et al.***

**File name: Supplementary Movie 1**

Description: Supplementary Movie 1 shows the suturing process of Sil-MA hydrogel sheet.

**File name: Supplementary Movie 2**

Description: Supplementary Movie 2 shows the process of end to end anastomosis of dog’s trachea using Sil-MA hydrogel ring.

**File name: Supplementary Movie 3**

Description: Supplementary Movie 3 shows the process of pressing and releasing the brain shaped Sil-MA hydrogel with fingers.

**File name: Supplementary Movie 4**

Description: Supplementary Movie 4 shows the process of pressing and releasing the ear shaped Sil-MA hydrogel with fingers.

**File name: Supplementary Movie 5**

Description: Supplementary Movie 5 taken by confocal microscope shows Sil-MA hydrogel printed out to be the letter HL(the logo of Hallym University). Green signal indicates cells labeled with PKH67 encapsulated in Sil-MA hydrogel.

**File name: Supplementary Movie 6**

Description: Supplementary Movie 6 taken by single plane illumination microscopy (SPIM) which rotates 360 degrees shows Sil-MA hydrogel printed out to be the shape of human brain. Green signal indicates cells labeled with PKH67 encapsulated in Sil-MA hydrogel.

**File name: Supplementary Movie 7**

Description: Supplementary Movie 7 taken by SPIM which rotates 360 degrees shows Silk-MA hydrogel printed out to be the letter HL. The printed letter consists of two different layers -PKH67 labeled cells (green) and PKH26 labeled cells (red).

**File name: Supplementary Movie 8**

Description: Supplementary Movie 8 taken by SPIM which rotates 360 degrees shows Sil-MA hydrogel printed out to be the shape of 4 cylinders piled up to be the shape of winding trachea; green and red cells by turns. This trachea shape consists of PKH67 labeled cells (green) and PKH26 labeled cells (red).
